# Supplementary material for: Revisiting syntheses of Ti(iv)/H2PO4–HPO4 functional ion-exchangers, properties and features
Source: Royal Society of Chemistry journal article supplement (doi:10.1039/c7nj03065g), 2017-11-06
Supplement: c7nj03065g1.pdf [file c7nj03065g1.pdf]

# Revisiting syntheses of Ti(IV)/H<sub>2</sub>PO<sub>4</sub>-HPO<sub>4</sub> functional ion-exchangers, properties and features

Mylène Trublet<sup>a\*</sup>, Daniela Rusanova<sup>a</sup>, Oleg N. Antzutkin<sup>a</sup>

<sup>a</sup>*Chemistry of Interfaces, Luleå Univeristy of Technology, 97187 Luleå, Sweden*

\*Correspondence to: [Mylene.Trublet@ltu.se](mailto:Mylene.Trublet@ltu.se), +46-(0)920-493448

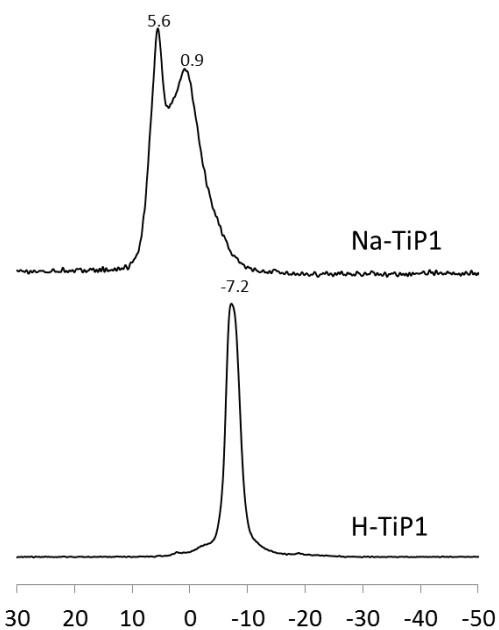

**Figure S1.** <sup>31</sup>P MAS NMR spectrum of Na-TiP1 and H-TiP1

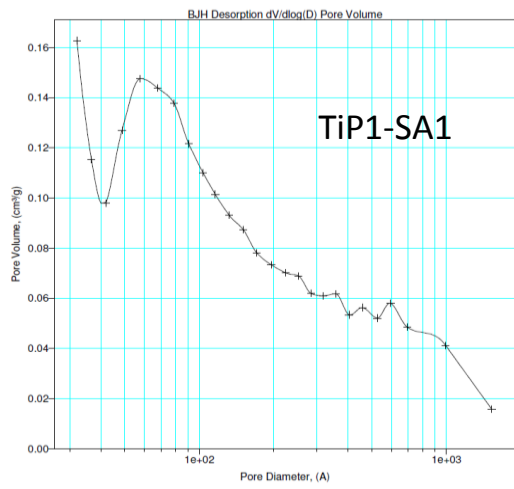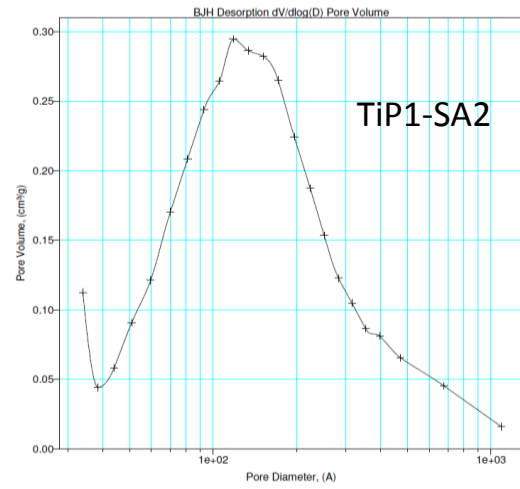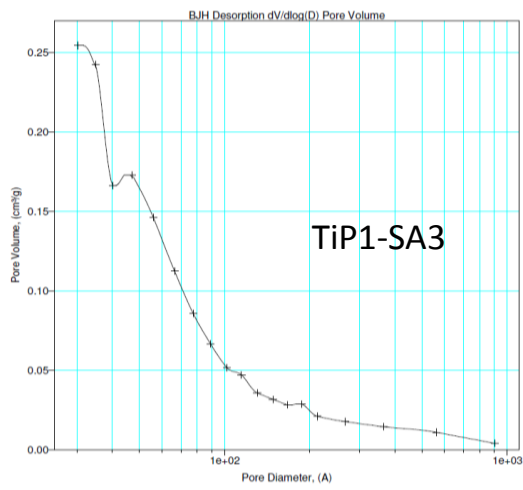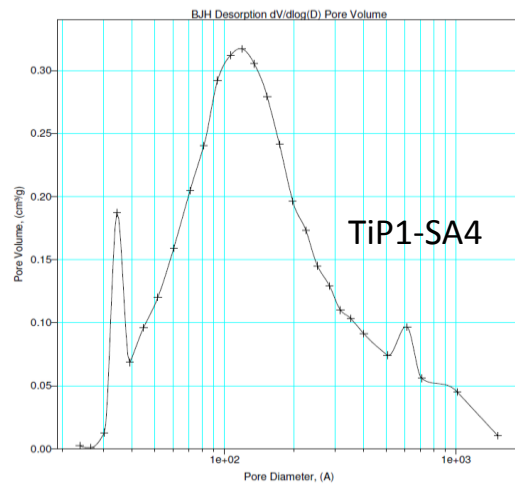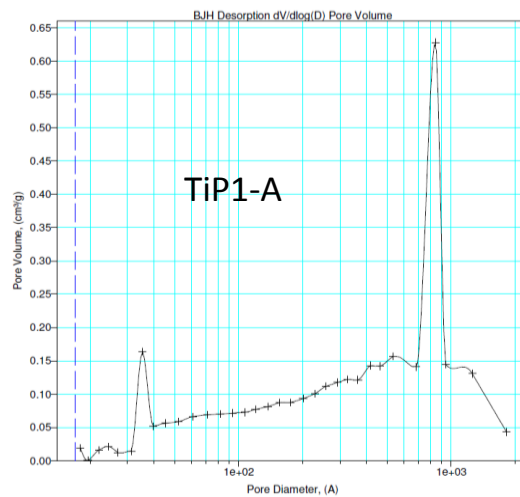

**Figure S2.** Pore size distribution of TiP1-SA1, TiP1-SA2, TiP1-SA3, TiP1-SA4 and TiP1-A.

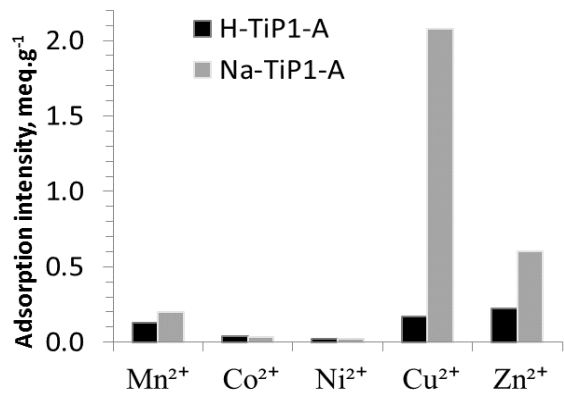

**Figure S3.** Selectivity of H-TiP1 towards divalent ions (Co<sup>2+</sup>, Cu<sup>2+</sup>, Mn<sup>2+</sup>, Ni<sup>2+</sup>, Zn<sup>2+</sup>). Sorption on synthetic water.
